# Supplementary material for: TMED4 facilitates regulatory T cell suppressive function via ROS homeostasis in tumor and autoimmune mouse models
Source: JCI journal article supplement (doi:10.1172/jci179874), 2024-10-31

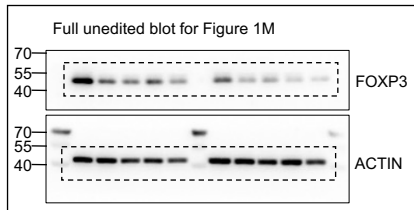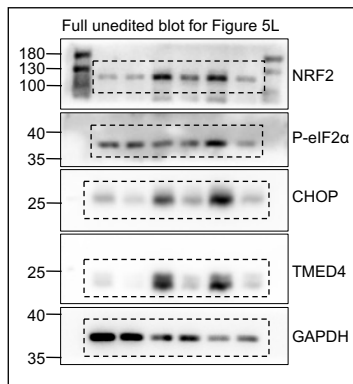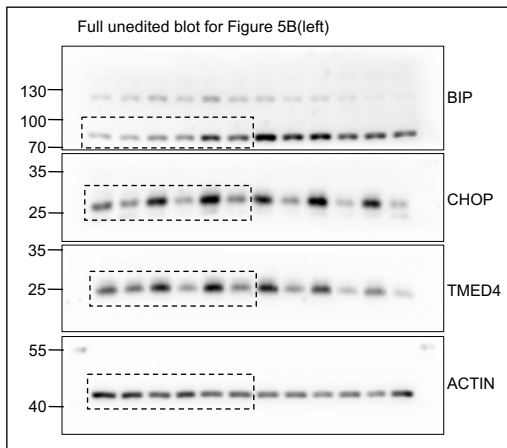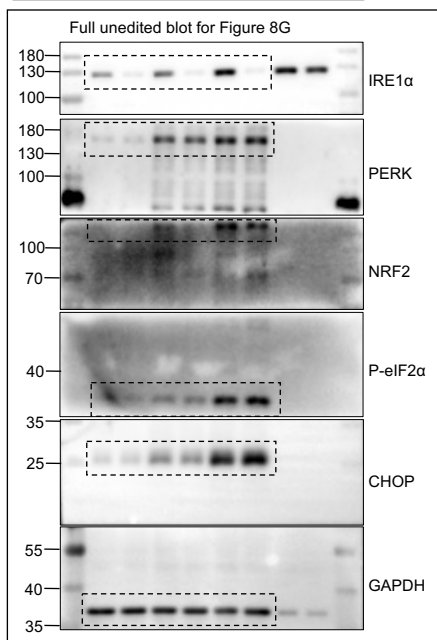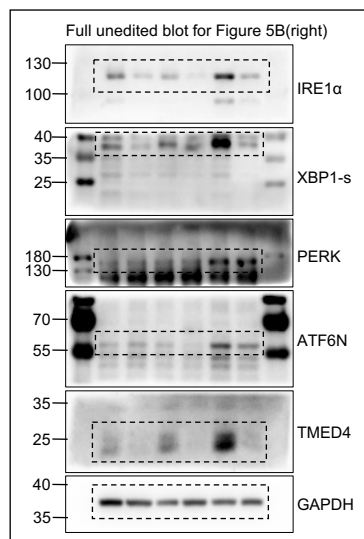

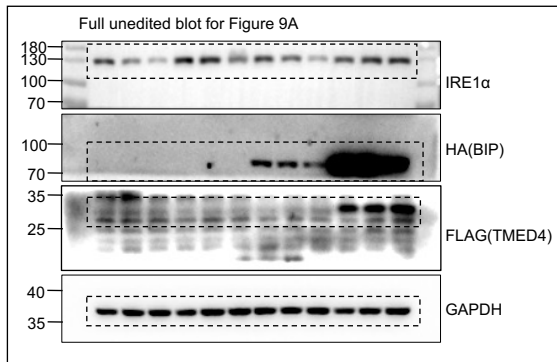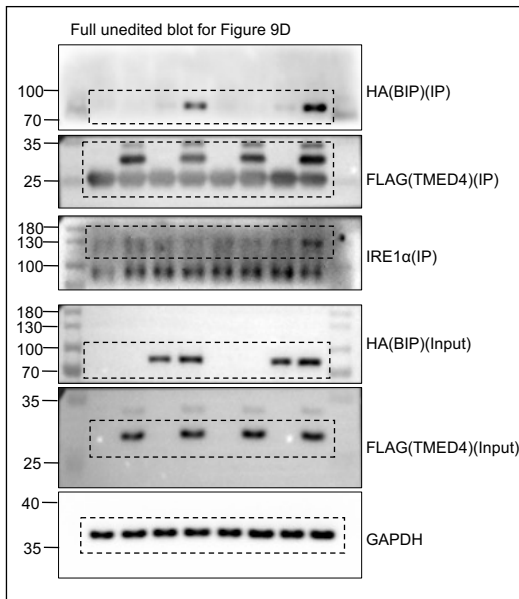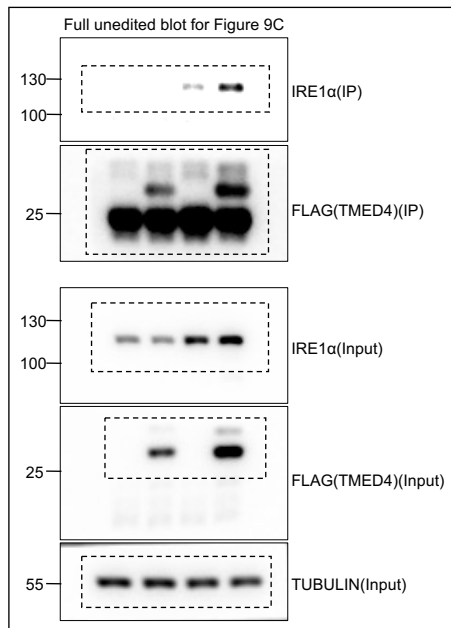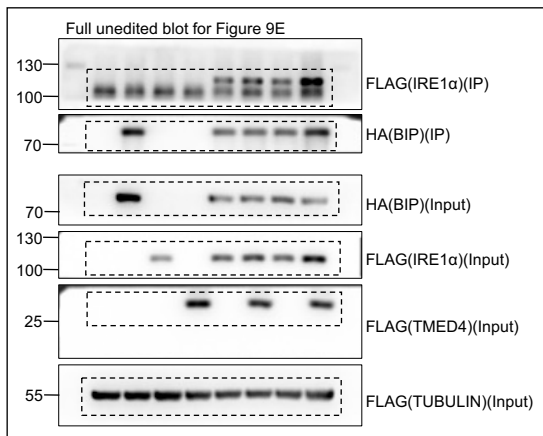

Full unedited blot for Figure 10A

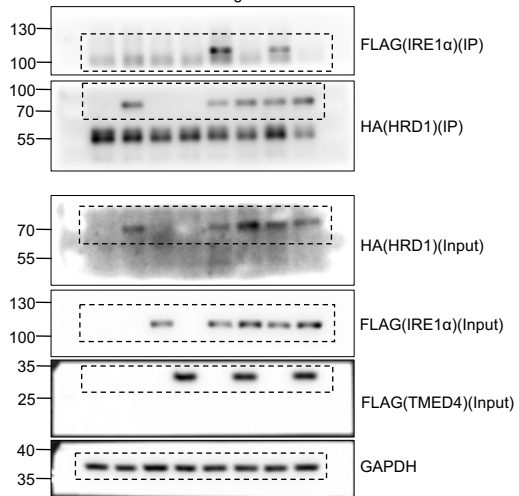

Full unedited blot for Figure 10B

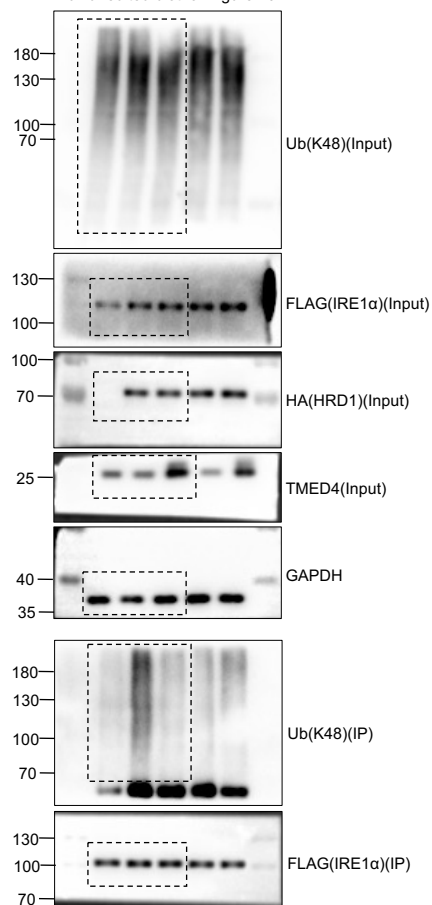

Full unedited blot for Figure 10C

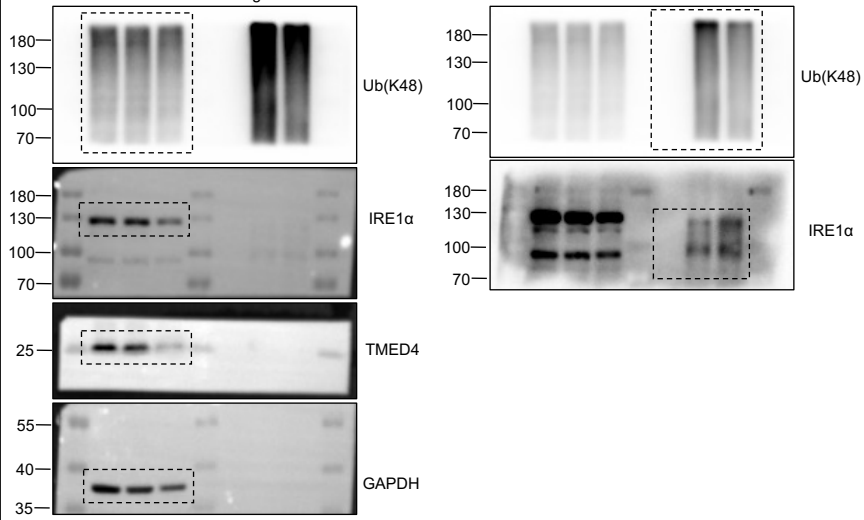

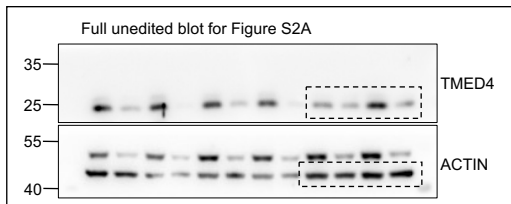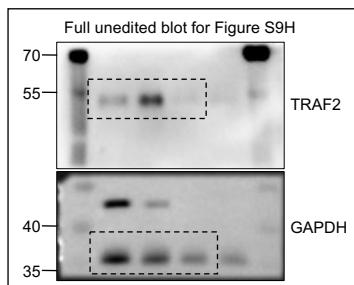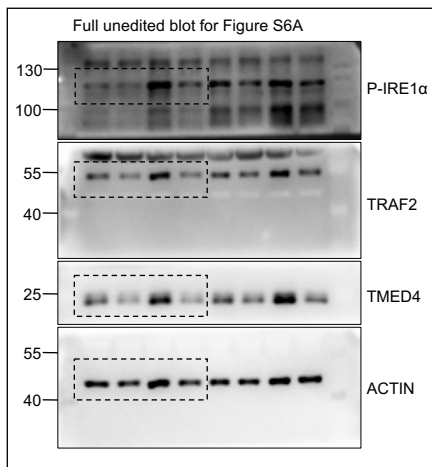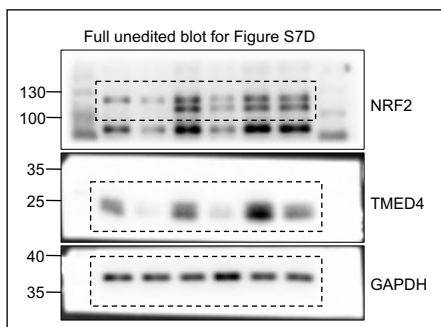

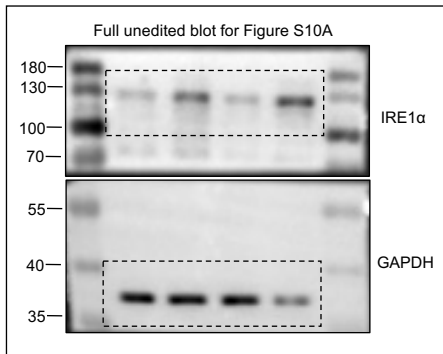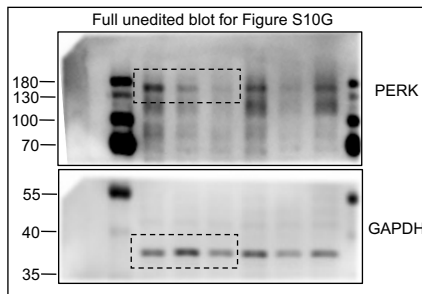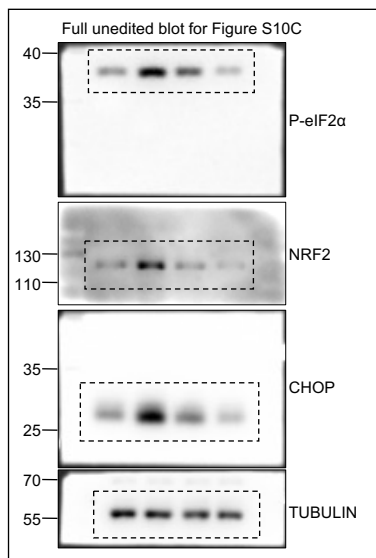

Supplement: sd2 [file 2]
